# Supplementary material for: TOP Solutions for facilitating primary health care delivery for refugees in Iran: a qualitative study
Source: Research Square preprint supplement (doi:10.21203/rs.3.rs-7348196/v1), 2025-09-30
Supplement: Supplementary file 1 [file 7d04718792c7444a32b53e00.docx]

Interview guide for TOP Solutions for facilitating primary health care delivery for refugees in Iran: a qualitative study

**Purpose of the Study**:

This study was conducted with the aim of identifying the most important challenges and solutions for providing health services to refugees.
**Confidentiality and Consent**:

All responses will be kept confidential. Participation is voluntary, and participants can withdraw at any time without any consequences. Please indicate your consent to participate and allow recording of the interview by signing below:

**Consent**: Yes [ ] No [ ]
**Recording Permission**: Yes [ ] No [ ]
**Signature of Participant**: ___________________
**Date**: __________________

**Section 1: Background and Professional Experience**

1. Please describe your role and professional experience in the healthcare sector, particularly your experience with PHC.

2. What has been your involvement with Primary Health Care (PHC) in Iran?

**________________________________________**

**Section 2:**

(1) What is your general view on providing primary health care services to refugees?

(2) What are the most important challenges of providing primary health care services to refugees?

(3) What are your concrete and operational suggestions and solutions to overcome the mentioned challenges?

(4) Which are the needs of refugee health care?

(5) How should the health care of refugees be organized in the future?

**_____________ _______________________**

**Closing:**

Thank you for your time and valuable insights. Your participation is greatly appreciated. If needed, may we contact you for additional clarification?

**Permission for Follow-up: Yes [ ] No [ ]**

**Contact Information:**

**• Name: ___________________**

**• Email: ___________________**

**• Phone: ___________________**

**Context of providing primary health care to refugees in Iran:**

Providing healthcare services to refugees is similar to Iranians. Paying attention to human, religious values and human dignity has caused the continuation of service to these groups. It is very valuable to mention that the healthcare services provided to this population are provided completely free of charge. In the villages of Iran, refugees go to health centers and basic health care is provided to them by Behvarz* and general practitioners. Also, in cities, they receive these cares in health centers and from the health team. An electronic health record is created for them, and if they need more specialized services, they are referred to rural/urban health centers through GP, and through that, they are referred to hospitals and province health centers.

All services such as vaccination, mother and child care, pregnancy, control and prevention of communicable diseases, old age care and various screenings such as deafness/hearing loss, diabetes, high blood pressure, thalassemia, PKU and hundreds of other cares It is done for refugees (1, 2).

***Behvarz:**

Iranian community health worker (CHW), called *behvarze* in the Farsi language, are local health workers with specialized training in the health needs of the rural population. *Behvarzes* are selected from the rural areas where they live and are committed to reside in their area for at least 4 years after training (3)

1. UNHCR’s Refugee Population Statistics Database [Internet]. The United Nations High Commissioner for Refugees. 2022 [cited 06/2023]. Available from: <https://www.unhcr.org/refugee-statistics/>.

2. Refugees in Iran 2021 [Available from: <https://www.unhcr.org/ir/refugees-in-iran/>.

3. Javanparast S, Baum F, Labonte R, Sanders D. Community health workers' perspectives on their contribution to rural health and well-being in Iran. American journal of public health. 2011;101(12):2287-92.
